# Supplementary material for: Infertility Treatments Resulting in Twin Pregnancy: Does It Increase the Risk for Future Childhood Malignancy
Source: MDPI journal article supplement (doi:10.3390/jcm12113728), 2023-05-29
Supplement: s1 [file s1]

Supplementary Table S1: Twenty-four cases of children that were diagnosed with a childhood malignancy during the study period.

| Case number | Year of birth | Gender | Birthweight | Y/N Infertility Treatments | Follow up (years) | Cancer Type        |
|-------------|---------------|--------|-------------|----------------------------|-------------------|--------------------|
| 1           | 1996          | Male   | 2890        | N                          | 11.35             | Leukemia           |
| 2           | 2002          | Male   | 3040        | N                          | 0.96              | Brain              |
| 3           | 1997          | Male   | 2820        | N                          | 12.76             | Lymphoma           |
| 4           | 2003          | Female | 2410        | N                          | 0.35              | Kidney             |
| 5           | 1993          | Female | 2000        | Y                          | 8.88              | Leukemia           |
| 6           | 2019          | Male   | 1480        | N                          | 0.73              | Kidney             |
| 7           | 2005          | Male   | 2365        | Y                          | 5.53              | Brain              |
| 8           | 2007          | Female | 2590        | N                          | 6.36              | Kidney, Secondary  |
| 9           | 2007          | Female | 2630        | N                          | 8.25              | Skin               |
| 10          | 2016          | Female | 2700        | N                          | 1.27              | Brain              |
| 11          | 2020          | Female | 2840        | N                          | 0.87              | Leukemia           |
| 12          | 2020          | Female | 2855        | N                          | 0.21              | NOS                |
| 13          | 1997          | Female | 2455        | Y                          | 2.21              | Vagina Vulva       |
| 14          | 2014          | Female | 1975        | N                          | 5.52              | Kidney             |
| 15          | 1992          | Male   | 2520        | N                          | 3.68              | Leukemia           |
| 16          | 2004          | Male   | 2850        | N                          | 16.44             | Leukemia           |
| 17          | 2009          | Female | 2488        | Y                          | 6.29              | Skin               |
| 18          | 2000          | Male   | 2780        | Y                          | 6.00              | Kidney             |
| 19          | 2011          | Female | 1227        | N                          | 0.23              | Ophthalmic         |
| 20          | 1998          | Male   | 2650        | Y                          | 6.12              | Testis             |
| 21          | 2000          | Female | 1505        | N                          | 17.93             | Lymphoma, Leukemia |
| 22          | 1994          | Male   | 3430        | N                          | 0.85              | NOS                |
| 23          | 1996          | Female | 2995        | N                          | 11.49             | Lymphoma           |
| 24          | 2015          | Female | 2095        | N                          | 4.23              | Brain              |

Table S2.

| Diagnosis Code | Diagnosis                                          | Subgroup      |
|----------------|----------------------------------------------------|---------------|
| 193            | MALIGNANT NEOPLASM OF THYROID GLAND                | head and neck |
| 1409           | MALIGNANT NEOPLASM OF LIP, UNSP., VERMILION BORDER | head and neck |
| 1420           | MALIGNANT NEOPLASM OF PAROTID GLAND                | head and neck |
| 1450           | MALIGNANT NEOPLASM OF CHEEK MUCOSA                 | head and neck |
| 1479           | MALIGNANT NEOPLASM OF NASOPHARYNX, UNSPECIFIED     | head and neck |
| 1950           | MALIGNANT NEOPLASM OF HEAD, FACE, AND NECK         | head and neck |
| 1502           | MALIGNANT NEOPLASM OF ABDOMINAL ESOPHAGUS          | esophagus     |
| 1519           | MALIGNANT NEOPLASM OF STOMACH, UNSPECIFIED         | stomach       |

|       |                                                                 |                   |
|-------|-----------------------------------------------------------------|-------------------|
| 1540  | MALIGNANT NEOPLASM OF RECTOSIGMOID JUNCTION                     | colon rectum      |
| 1541  | MALIGNANT NEOPLASM OF RECTUM                                    | colon rectum      |
| V1006 | PERSONAL HISTORY OF MAL.NEO.RECTUM,RECTOSIGMOID JUNCTION,ANUS   | colon rectum      |
| V1009 | PERSONAL HISTORY MAL.NEOPL.OTHER SITES IN GASTROINTEST.TRACT    | colon rectum      |
| 1550  | MALIGNANT NEOPLASM OF LIVER, PRIMARY                            | liver             |
| 1570  | MALIGNANT NEOPLASM OF HEAD OF PANCREAS                          | pancreas          |
| 1579  | MALIGNANT NEOPLASM OF PANCREAS, PART UNSPECIFIED                | pancreas          |
| 1580  | MALIGNANT NEOPLASM OF RETROPERITONEUM                           | retroperitoneum   |
| 1589  | MALIGNANT NEOPLASM OF PERITONEUM, UNSPECIFIED                   | peritoneum        |
| 1629  | MALIGNANT NEOPLASM OF BRONCHUS AND LUNG, UNSPECIFIED            | lung              |
| 2319  | CARCINOMA IN SITU OF RESPIRATORY SYSTEM, PART UNSPECIFIED       | lung              |
| 2391  | NEOPLASM OF UNSPECIFIED NATURE OF RESPIRATORY SYSTEM            | lung              |
| V102  | PERSONAL HISTORY MAL.NEOPL.OTHER RESPIR.AND INTRATHOR.ORGANS    | lung              |
| 1642  | MALIGNANT NEOPLASM OF ANTERIOR MEDIASTINUM                      | mediastinum       |
| 1649  | MALIGNANT NEOPLASM OF MEDIASTINUM, PART UNSPECIFIED             | mediastinum       |
| 1701  | MALIGNANT NEOPLASM OF MANDIBLE                                  | bone              |
| 1702  | MAL.NEOPLASM OF VERTEBRAL COLUMN, EXCLUDING SACRUM & COCCYX     | bone              |
| 1703  | MALIGNANT NEOPLASM OF RIBS, STERNUM, AND CLAVICLE               | bone              |
| 1704  | MALIGNANT NEOPLASM OF SCAPULA AND LONG BONES OF UPPER LIMB      | bone              |
| 1706  | MALIGNANT NEOPLASM OF PELVIC BONES, SACRUM, AND COCCYX          | bone              |
| 1707  | MALIGNANT NEOPLASM OF LONG BONES OF LOWER LIMB                  | bone              |
| 1708  | MALIGNANT NEOPLASM OF SHORT BONES OF LOWER LIMB                 | bone              |
| 1709  | MAL.NEOPLASM OF BONE AND ARTICULAR CARTILAGE, SITE UNSPEC.      | bone              |
| V1081 | PERSONAL HISTORY OF MALIGNANT NEOPLASM OF BONE                  | bone              |
| 1710  | MAL.NEOPLASM OF CONNECTIVE AND SOFT TISSUE,HEAD,FACE,NECK       | connective tissue |
| 1712  | MAL.NEOPLASM CONNec.AND SOFT TISSUE,UPPER LIMB,INCL.SHOULDER    | connective tissue |
| 1713  | MAL.NEOPLASM OF CONNECTIVE AND SOFT TISSUE LOWER LIMB,INCL.HIP  | connective tissue |
| 1714  | MAL.NEOPLASM OF CONNECTIVE AND OTHER SOFT TISSUE OF THORAX      | connective tissue |
| 1715  | MAL.NEOPLASM OF CONNECTIVE AND OTHER SOFT TISSUE OF ABDOMEN     | connective tissue |
| 1716  | MAL.NEOPLASM OF CONNECTIVE AND OTHER SOFT TISSUE OF PELVIS      | connective tissue |
| 1717  | MAL.NEOPLASM OF CONNECTIVE AND SOFT TISSUE OF TRUNK,UNSPECIFIED | connective tissue |
| 1718  | MAL.NEO.OF OTHER SPEC. SITES OF CONNECT.AND SOFT TISSUE         | connective tissue |
| 1719  | MAL.NEOPLASM OF CONNECTIVE AND SOFT TISSUE,SITE UNSPECIFIED     | connective tissue |
| 173   | OTHER MALIGNANT NEOPLASM OF SKIN                                | skin              |
| 1725  | MALIGNANT MELANOMA OF SKIN OF TRUNK, EXCEPT SCROTUM             | skin              |
| 1726  | MALIGNANT MELANOMA OF SKIN OF UPPER LIMB, INCLUDING             | skin              |

|       |                                                               |              |
|-------|---------------------------------------------------------------|--------------|
|       | SHOULDER                                                      |              |
| 1729  | MELANOMA OF SKIN, SITE UNSPECIFIED                            | skin         |
| 1733  | MALIGNANT NEOPLASM OF SKIN OF UNSPECIFIED PARTS OF FACE       | skin         |
| V1082 | PERSONAL HISTORY OF MALIGNANT MELANOMA OF SKIN                | skin         |
| 1741  | MALIGNANT NEOPLASM OF CENTRAL PORTION OF FEMALE BREAST        | breast       |
| 1830  | MALIGNANT NEOPLASM OF OVARY                                   | ovary        |
| 1840  | MALIGNANT NEOPLASM OF VAGINA                                  | vagina vulva |
| 1844  | MALIGNANT NEOPLASM OF VULVA, UNSPECIFIED                      | vagina vulva |
| 2123  | BENIGN NEOPLASM OF BRONCHUS AND LUNG                          | vagina vulva |
| 2462  | CYST OF THYROID                                               | vagina vulva |
| 20960 | BENIGN CARCINOID TUMOR OF UNKNOWN PRIMARY SITE                | vagina vulva |
| 1869  | MALIGNANT NEOPLASM OF OTHER AND UNSPECIFIED TESTIS            | testis       |
| V1047 | PERSONAL HISTORY OF MALIGNANT NEOPLASM OF TESTIS              | testis       |
| 1889  | MALIGNANT NEOPLASM OF BLADDER, PART UNSPECIFIED               | bladder      |
| 1890  | MALIGNANT NEOPLASM OF KIDNEY, EXCEPT PELVIS                   | kidney       |
| V1052 | PERSONAL HISTORY OF MALIGNANT NEOPLASM OF KIDNEY              | kidney       |
| 1905  | MALIGNANT NEOPLASM OF RETINA                                  | ophthalmic   |
| V1084 | PERSONAL HISTORY OF MALIGNANT NEOPLASM OF EYE                 | ophthalmic   |
| 1910  | MALIGNANT NEOPLASM OF CEREBRUM, EXCEPT LOBES AND VENTRICLES   | brain        |
| 1912  | MALIGNANT NEOPLASM OF TEMPORAL LOBE                           | brain        |
| 1913  | MALIGNANT NEOPLASM OF PARIETAL LOBE                           | brain        |
| 1914  | MALIGNANT NEOPLASM OF OCCIPITAL LOBE                          | brain        |
| 1915  | MALIGNANT NEOPLASM OF VENTRICLES                              | brain        |
| 1916  | MALIGNANT NEOPLASM OF CEREBELLUM NOS                          | brain        |
| 1917  | MALIGNANT NEOPLASM OF BRAIN STEM                              | brain        |
| 1918  | MALIGNANT NEOPLASM OF OTHER PARTS OF BRAIN                    | brain        |
| 1919  | MALIGNANT NEOPLASM OF BRAIN, UNSPECIFIED                      | brain        |
| 1920  | MALIGNANT NEOPLASM OF CRANIAL NERVES                          | brain        |
| 1921  | MALIGNANT NEOPLASM OF CEREBRAL MENINGES                       | brain        |
| 1928  | MALIGNANT NEOPLASM OF OTHER SPECIFIED SITES OF NERVOUS SYSTEM | brain        |
| V1085 | PERSONAL HISTORY OF MALIGNANT NEOPLASM OF BRAIN               | brain        |
| 1940  | MALIGNANT NEOPLASM OF ADRENAL GLAND                           | adrenal      |
| 1960  | 2ND AND UNSP.MAL.NEOP.L OF LYMPH NODES,HEAD,FACE AND NECK     | secondary    |
| 1963  | 2ND AND UNSP.MAL.NEOP.L OF LYMPH NODES OF AXILLA+UPPER LIMB   | secondary    |
| 1970  | SECONDARY MALIGNANT NEOPLASM OF LUNG                          | secondary    |
| 1980  | SECONDARY MALIGNANT NEOPLASM OF KIDNEY                        | secondary    |
| 1983  | SECONDARY MALIGNANT NEOPLASM OF BRAIN AND SPINAL CORD         | secondary    |
| 1985  | SECONDARY MALIGNANT NEOPLASM OF BONE AND BONE MARROW          | secondary    |
| 19889 | SECONDARY MALIGNANT NEOPLASM OF OTHER SPECIFIED SITES         | secondary    |
| 202   | OTHER MALIGNANT NEOPLASMS OF LYMPHOID & HISTIOCYTIC TISSUE    | lymphoma     |
| 2001  | LYMPHOSARCOMA                                                 | lymphoma     |
| 2002  | BURKITT'S TUMOR OR LYMPHOMA                                   | lymphoma     |
| 2021  | MYCOSIS FUNGOIDES                                             | lymphoma     |
| 2028  | OTHER MALIGNANT LYMPHOMAS                                     | lymphoma     |
| 20011 | LYMPHOSARCOMA INVOLVING LYMPH NODES OF HEAD, FACE, AND        | lymphoma     |

|       |                                                                        |          |
|-------|------------------------------------------------------------------------|----------|
|       | NECK                                                                   |          |
| 20012 | LYMPHOSARCOMA INVOLVING INTRATHORACIC LYMPH NODES                      | lymphoma |
| 20013 | LYMPHOSARCOMA INVOLVING INTRA-ABDOMINAL LYMPH NODES                    | lymphoma |
| 20020 | BURKITT'S TUMOR OR LYMPHOMA, UNSP.SITE, EXTRANODAL & SOLID ORGAN SITES | lymphoma |
| 20021 | BURKITT'S TUMOR;LYMPHOMA INVOLV.LYMPH NODES HEAD,FACE,NECK             | lymphoma |
| 20023 | BURKITT'S TUMOR,LYMPHOMA INVOLV.INTRA-ABDOMINAL LYMPH NODES            | lymphoma |
| 20025 | BURKITT'S TUMOR;LYMPHOMA INV.LYMPH NODES IN-GUIN.REG./LOWER LIMB       | lymphoma |
| 20028 | BURKITT'S TUMOR;LYMPHOMA INVOLVING LYMPH NODES MULTIPLE SITES          | lymphoma |
| 20151 | HODGKIN'S DIS.NODULAR SCLEROSIS,INVOLVING HEAD,FACE,NECK               | lymphoma |
| 20152 | HODGKIN'S DIS.NODULAR SCLEROSIS,INVOLV.INTRATHORACIC LYMPH N.          | lymphoma |
| 20161 | HODGKIN'S DIS.MIXED CELLULARITY,INVOLVING HEAD,FACE,NECK               | lymphoma |
| 20162 | HODGKIN'S DIS.MIXED CELLULARITY,INVOLV.INTRATHORACIC LYMPH N.          | lymphoma |
| 20190 | HODGKIN'S DIS.,UNSP. TYPE, UNSP. SITE, EXTRANODAL & SOLID ORGAN SITES  | lymphoma |
| 20191 | HODGKIN'S DIS.UNSPECIFIED TYPE,INVOLVING HEAD,FACE,NECK                | lymphoma |
| 20192 | HODGKIN'S DISEASE UNSP.TYPE,INVOLV.INTRATHORACIC LYMPH NODES           | lymphoma |
| 20193 | HODGKIN'S DISEASE UNSP.TYPE,INVOLV.INTRA-ABDOMINAL LYMPH NODES         | lymphoma |
| 20196 | HODGKIN'S DIS.UNSPECIFIED TYPE,INVOLV.INTRAPELVIC LYMPH NODES          | lymphoma |
| 20198 | HODGKIN'S DIS.UNSPECIFIED TYPE,INVOLVING MULTIPLE SITES                | lymphoma |
| 20200 | NODULAR LYMPHOMA, UNSP.SITE, EXTRANODAL & SOLID ORGAN SITES            | lymphoma |
| 20202 | NODULAR LYMPHOMA INVOLVING INTRATHORACIC LYMPH NODES                   | lymphoma |
| 20210 | MYCOSIS FUNGOIDES, UNSP.SITE, EXTRANODAL AND SOLID ORGAN SITES         | lymphoma |
| 20211 | MYCOSIS FUNGOIDES INVOLVING LYMPH NODES OF HEAD, FACE, AND NECK        | lymphoma |
| 20212 | MYCOSIS FUNGOIDES INVOLVING INTRATHORACIC LYMPH NODES                  | lymphoma |
| 20213 | MYCOSIS FUNGOIDES INVOLVING INTRA-ABDOMINAL LYMPH NODES                | lymphoma |
| 20280 | OTHER MALIGNANT LYMPHOMAS, UNSP.SITE, EXTRANODAL & SOLID ORGAN SITES   | lymphoma |
| 20281 | OTHER MALIGNANT LYMPHOMAS INVOLV.LYMPH NODES HEAD,FACE,NECK            | lymphoma |
| 20282 | OTHER MALIGNANT LYMPHOMAS INVOLVING INTRATHORACIC LYMPH NODES          | lymphoma |
| 20283 | OTHER MALIGNANT LYMPHOMAS INVOLVING INTRA-ABDOMINAL LYMPH NODES        | lymphoma |
| 20285 | OTHER MALIGNANT LYMPHOMAS INVOLVING INGUINAL REG./LOWER LIMB           | lymphoma |
| 20293 | UNSP.MAL.NEO.OF LYMPHOID/HISTIOCYTIC,INTRA-ABDOMINAL LYMPH N.          | lymphoma |
| V1071 | PERSONAL HISTORY OF LYMPHOSARCOMA AND RETICULOSARCOMA                  | lymphoma |
| V1072 | PERSONAL HISTORY OF HODGKIN'S DISEASE                                  | lymphoma |

|       |                                                                   |          |
|-------|-------------------------------------------------------------------|----------|
| V1079 | PERSONAL HISTORY OF OTHER LYMPHATIC + HEMATOPOIETIC NEOPL.        | lymphoma |
| 204   | LYMPHOID LEUKEMIA                                                 | leukemia |
| 2040  | LYMPHOID LEUKEMIA, ACUTE                                          | leukemia |
| 2040  | LYMPHOID LEUKEMIA, ACUTE פרט 1992                                 | leukemia |
| 2080  | LEUKEMIA OF UNSPECIFIED CELL TYPE, ACUTE פרט 1992                 | leukemia |
| 2089  | UNSPECIFIED LEUKEMIA פרט 1992                                     | leukemia |
| 20300 | MULTIPLE MYELOMA WITHOUT MENTION OF REMISSION                     | leukemia |
| 20400 | ACUTE LYMPHOID LEUKEMIA WITHOUT MENT.OF HAVING ACHIEVED REMISSION | leukemia |
| 20400 | LYMPHOID LEUKEMIA, AC., WITHOUT MENTION OF REMISSION              | leukemia |
| 20401 | LYMPHOID LEUKEMIA, ACUTE, IN REMISSION                            | leukemia |
| 20402 | ACUTE LYMPHOID LEUKEMIA IN RELAPSE                                | leukemia |
| 20500 | MYELOID LEUKEMIA, AC., WITHOUT MENTION OF HAVING ACHIEVED REMISS. | leukemia |
| 20500 | MYELOID LEUKEMIA, AC., WITHOUT MENTION OF REMISSION               | leukemia |
| 20502 | ACUTE MYELOID LEUKEMIA IN RELAPSE                                 | leukemia |
| 20510 | MYELOID LEUKEMIA, CHR., WITHOUT MENTION OF HAVING ACHIEVED REMIS. | leukemia |
| 20530 | MYELOID SARCOMA WITHOUT MENTION OF REMISSION                      | leukemia |
| 20720 | MEGAKARYOCYTIC LEUKEMIA WITHOUT MENTION OF REMISSION              | leukemia |
| 20800 | AC.LEUKEMIA OF UNSP.CELL TYPE WITHO.MENT.OF HAVING ACHIEVED REMI. | leukemia |
| 20800 | LEUKEMIA, UNSP. CELL TYPE, AC., WITHOUT MENTION OF REMISSION      | leukemia |
| 20801 | LEUKEMIA OF UNSP. CELL TYPE, AC., IN REMISSION                    | leukemia |
| 20890 | UNSP. LEUKEMIA WITHOUT MENTION OF HAVING ACHIEVED REMISSION       | leukemia |
| 20890 | UNSP. LEUKEMIA WITHOUT REMISSION                                  | leukemia |
| 27788 | TUMOR LYSIS SYNDROME                                              | leukemia |
| 28522 | ANEMIA IN NEOPLASTIC DISEASE                                      | leukemia |
| V1061 | PERSONAL HISTORY OF LYMPHOID LEUKEMIA                             | leukemia |
| V1062 | PERSONAL HISTORY OF MYELOID LEUKEMIA                              | leukemia |
| V1069 | PERSONAL HISTORY OF OTHER LEUKEMIA                                | leukemia |
| 1735  | OTHER MALIGNANT NEOPLASM OF SKIN OF TRUNK, EXCEPT SCROTUM         | OTHER    |
| 1952  | MALIGNANT NEOPLASM OF ABDOMEN                                     | OTHER    |
| 2390  | NEOPLASM OF UNSPECIFIED NATURE OF DIGESTIVE SYSTEM                | OTHER    |
| 2392  | NEOPLASM OF UNSPECIFIED NATURE OF BONE, SOFT TISSUE, AND SKIN     | OTHER    |
| 2395  | NEOPLASM OF UNSPECIFIED NATURE OF OTHER GENITOURINARY ORGANS      | OTHER    |
| 2396  | NEOPLASM OF UNSPECIFIED NATURE OF BRAIN                           | OTHER    |
| 2398  | NEOPLASM OF UNSPECIFIED NATURE OF OTHER SPECIFIED SITES           | OTHER    |
| 20002 | RETICULOSARCOMA INVOLVING INTRATHORACIC LYMPH NODES               | OTHER    |
| 23989 | NEOPLASM OF UNSPECIFIED NATURE OF OTHER SPECIFIED SITES           | OTHER    |
